# Supplementary material for: Quantitative response to nitrite from field-induced decomposition of the chloride adduct of RDX by reactive stage tandem ion mobility spectrometry
Source: Royal Society of Chemistry journal article supplement (doi:10.1039/d0an01778g), 2020-10-30
Supplement: d0an01778g1.pdf [file d0an01778g1.pdf]

ELECTRONIC SUPPLEMENTARY INFORMATION

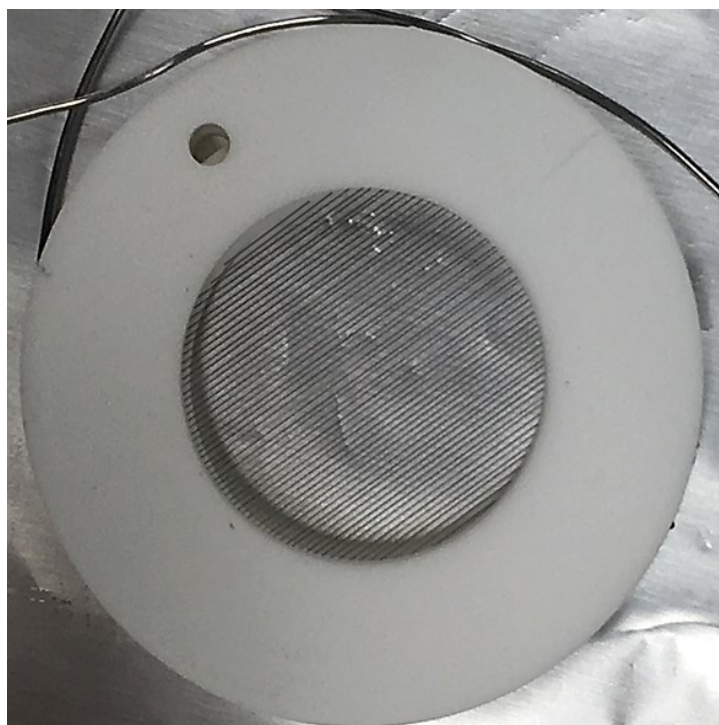

Figure S1. Photograph of in-house built reactive stage in the tandem IMS.

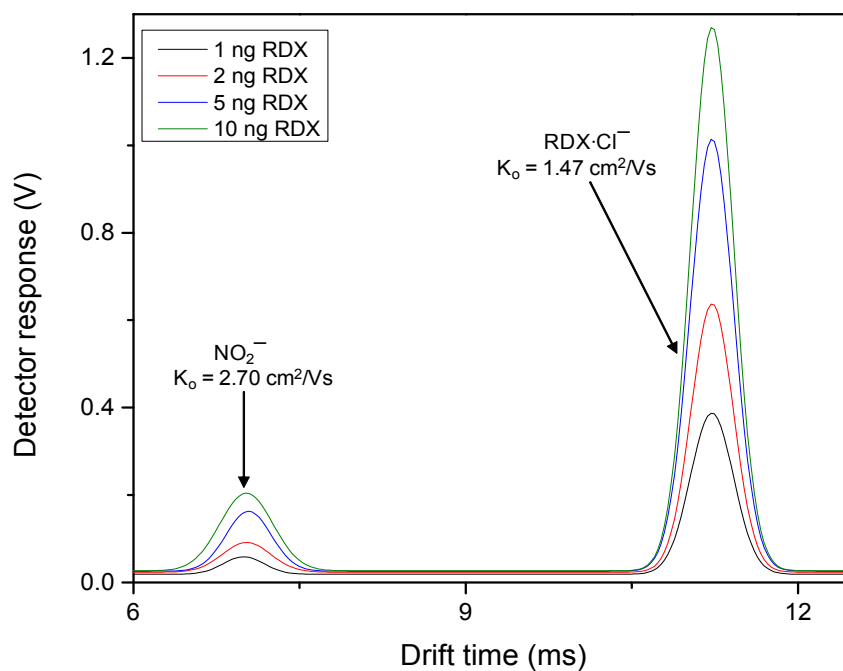

Figure S2. Ion mobility spectra of the chloride adduct of RDX at 170°C using mobility isolation and field induced decomposition at 112 Td in the reactive stage for different amounts of RDX on sample trap.

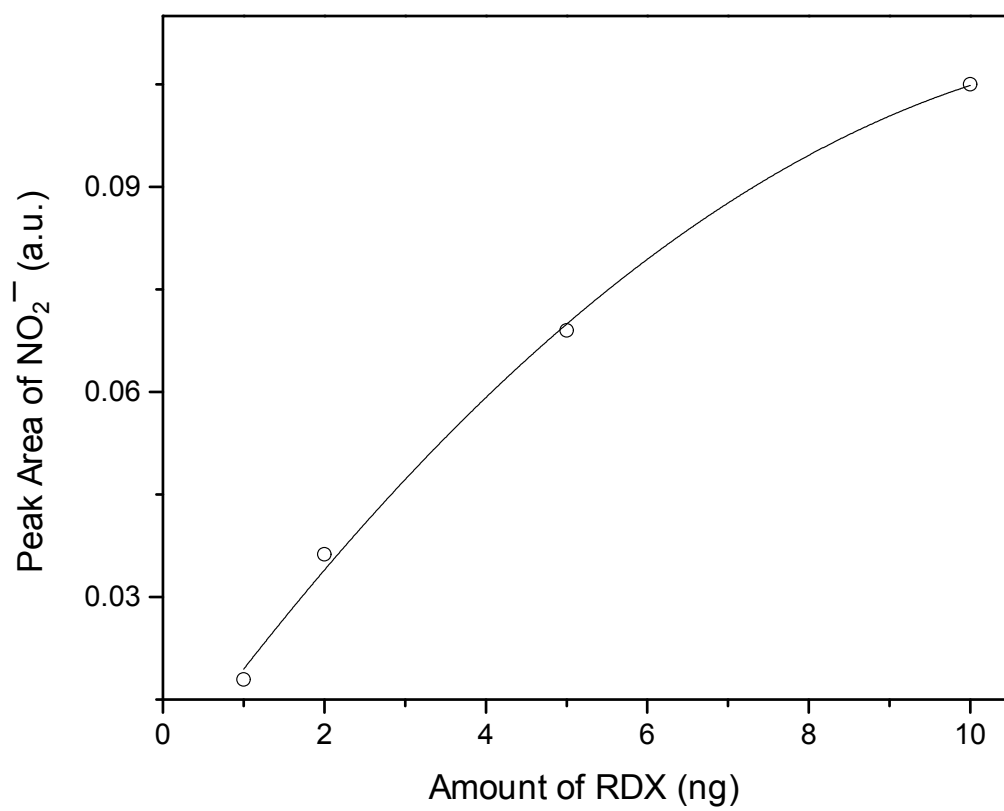

Figure S3. Plot of peak area of NO<sub>2</sub><sup>-</sup> vs different amounts of RDX·Cl<sup>-</sup> at 112 Td and 170 °C. The average standard deviation was 8.2 %.

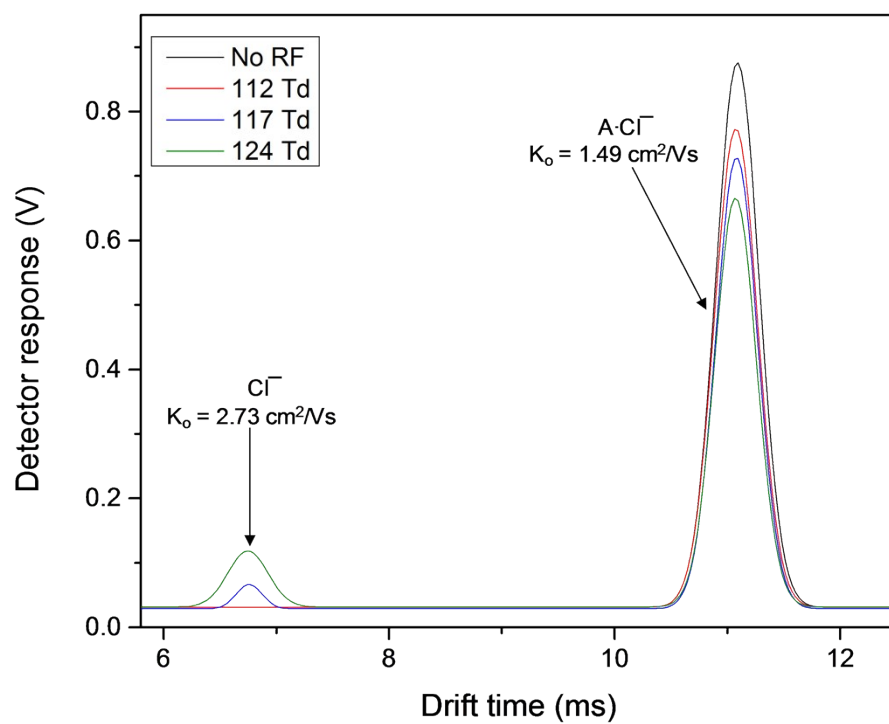

Figure S4. Ion mobility spectra at 170 °C for the chloride adduct of 10 ng Interferent A using mobility isolation at different electric fields.

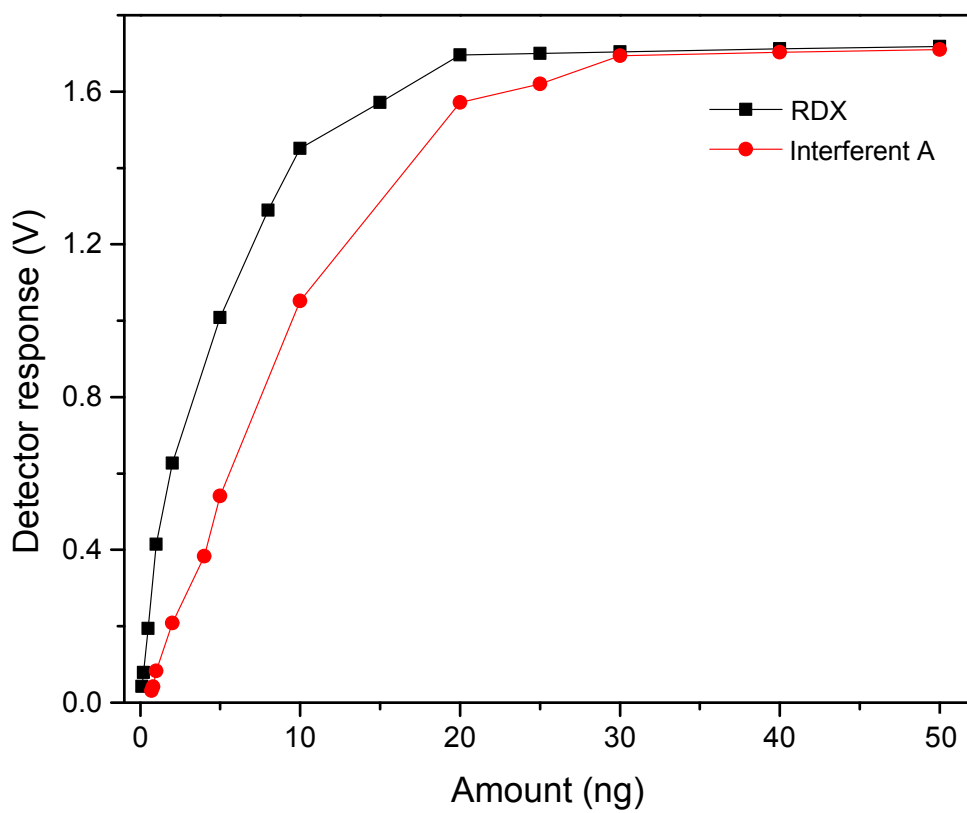

Figure S5. Response curve for chloride adduct of RDX and Interferent A using mode 2 at 170°C.

Table S1. Mobility Isolated Spectra of RDX

|                 | 1 ng RDX | 2 ng RDX | 5 ng RDX | 10 ng RDX |
|-----------------|----------|----------|----------|-----------|
| Drift time (ms) | 11.225   | 11.222   | 11.221   | 11.222    |
| Intensity (V)   | 0.445    | 0.649    | 0.985    | 1.402     |
| Peak Area       | 0.216    | 0.302    | 0.512    | 0.682     |
| Peak width      | 0.900    | 0.980    | 1.010    | 1.040     |

Table S2. Mobility spectra for  $\text{NO}_2^-$  obtained from 10 ng RDX at different electric fields

|                 | 102 Td | 112 Td | 117 Td | 123 Td |
|-----------------|--------|--------|--------|--------|
| Drift time (ms) | 6.972  | 6.971  | 6.982  | 6.982  |
| Intensity (V)   | 0.061  | 0.088  | 0.197  | 0.255  |
| Peak Area       | 0.0535 | 0.0836 | 0.117  | 0.154  |
| Peak width      | 0.701  | 0.853  | 0.982  | 1.000  |

Table S3. Data for nitrite ion at various amounts of RDX at 112 Td.

|                 | 1 ng   | 2 ng  | 5 ng  | 10 ng |
|-----------------|--------|-------|-------|-------|
| Drift time (ms) | 6.982  | 6.971 | 6.990 | 6.981 |
| Intensity (V)   | 0.042  | 0.075 | 0.145 | 0.187 |
| Peak Area       | 0.0182 | 0.035 | 0.066 | 0.102 |
| Peak width      | 0.701  | 0.858 | 0.955 | 1.040 |

Table S4. Table for different amount of A

|                      | 1 ng A | 2 ng A | 4 ng A | 6 ng A | 10 ng A |
|----------------------|--------|--------|--------|--------|---------|
| Drift time ( $t_d$ ) | 11.071 | 11.068 | 11.064 | 11.066 | 11.063  |
| Intensity (V)        | 0.141  | 0.258  | 0.395  | 0.605  | 0.925   |
| Peak Area (au)       | 0.071  | 0.131  | 0.193  | 0.279  | 0.436   |
| Peak width (ms)      | 0.935  | 0.951  | 0.990  | 1.000  | 1.020   |

Table S5. Table for Nitrite obtained from 2 ng RDX+ diff. amount A at 112 Td

|                      | 0 ng A | 1 ng A | 2 ng A | 4 ng A | 6 ng A | 10 ng A | Average       |
|----------------------|--------|--------|--------|--------|--------|---------|---------------|
| Drift time ( $t_d$ ) | 6.978  | 6.985  | 6.951  | 6.978  | 6.928  | 6.978   | 6.966±0.29 %  |
| FWHM (ms)            | 0.555  | 0.428  | 0.547  | 0.499  | 0.507  | 0.415   | 0.492±11.98 % |

Table S6. Difference in Response with increase in RDX ( $\Delta \text{area} / \Delta \text{RDX}$ ) at six amounts of Interferent A (ng)

|                          | Interferent A (ng)               |       |       |       |       |        |         |
|--------------------------|----------------------------------|-------|-------|-------|-------|--------|---------|
|                          | 0                                | 1     | 2     | 4     | 6     | 10     |         |
| $\Delta \text{RDX}$ (ng) | Mode 3. Chloride Adduct          |       |       |       |       |        |         |
| 2 to 4 ng                | 0.053                            | 0.054 | 0.040 | 0.038 | 0.041 | 0.032  | 39.62 % |
| 4 to 5 ng                | 0.042                            | 0.050 | 0.049 | 0.038 | 0.037 | 0.031  | 26.19 % |
|                          | Nitrite ion Mode 2 at 112 Td     |       |       |       |       |        |         |
| 2 to 4 ng                | 0.013                            | 0.013 | 0.011 | 0.013 | 0.012 | 0.012  | 7.69 %  |
| 4 to 5 ng                | 0.006                            | 0.005 | 0.006 | 0.004 | 0.008 | 0.0055 | 8.33 %  |
|                          | Residual Adduct Mode 2 at 112 Td |       |       |       |       |        |         |
| 2 to 4 ng                | 0.022                            | 0.022 | 0.020 | 0.018 | 0.019 | 0.017  | 22.72 % |
| 4 to 5 ng                | 0.019                            | 0.018 | 0.016 | 0.017 | 0.016 | 0.016  | 15.76 % |
